# Supplementary material
Source: MDPI journal article supplement (https://www.mdpi.com/2079-6412/13/6/1007)
Supplement: s1 [file s1]

Article

# Permeability of Skin-Mimicking Cell Coatings by Polymers of Complex Architecture Based on Polyoxazolines

Gia Storti <sup>1</sup>, Giulia Romano <sup>1</sup>, Kristen Gilmore <sup>1</sup>, Nicholas Sadowski <sup>1</sup>, Andrii Tiiara <sup>2</sup>, Igor Luzinov <sup>2</sup> and Alexander Sidorenko <sup>1,\*</sup>

<sup>1</sup> Department of Chemistry and Biochemistry, Saint Joseph's University, Philadelphia, PA 19131, USA; gs20605058@sju.edu (G.S.)

<sup>2</sup> Department of Materials Science and Engineering, Clemson University, Clemson, SC 29634, USA

\* Correspondence: asidorenko@sju.edu

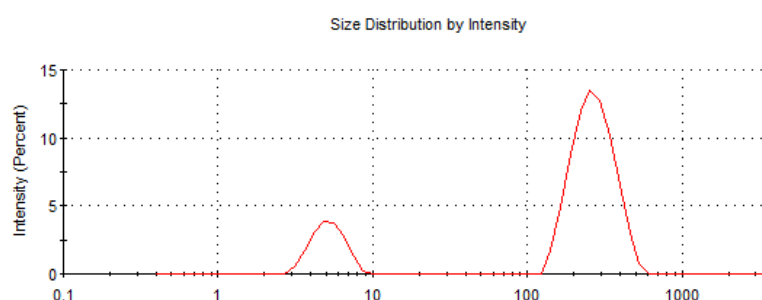

Figure S1. DLS data for 0.01% HCP A in buffer pH 6.86.

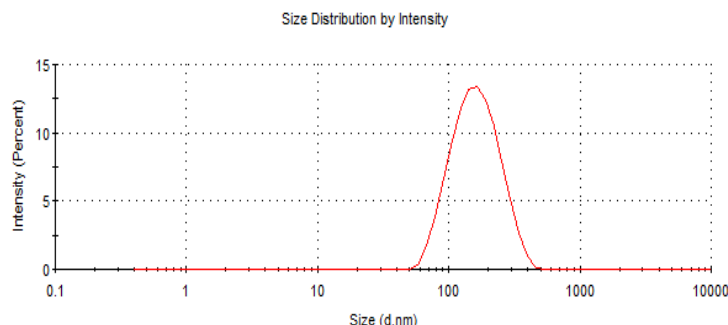

Figure S2. DLS data for 0.1% HCP A in water.

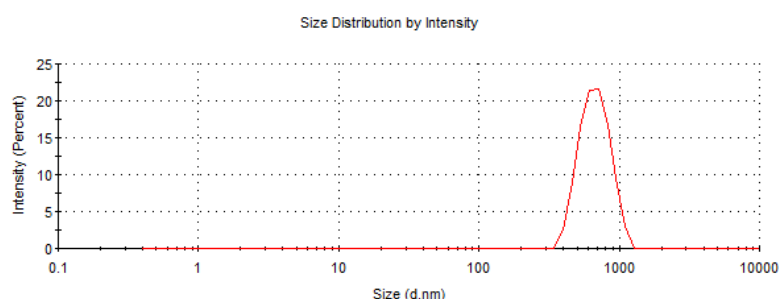

Figure S3. DLS data for 0.01% HCP B in buffer pH 6.86.

**Citation:** Storti, G.; Romano, G.; Gilmore, K.; Sadowski, N.; Tiiara, A.; Luzinov, I.; Sidorenko, A. Permeability of Skin-Mimicking Cell Coatings by Polymers of Complex Architecture Based on Polyoxazolines.

*Coatings* **2023**, *13*, 1007. <https://doi.org/10.3390/coatings13061007>

Academic Editor: Seungil Kim

Received: 29 April 2023

Revised: 22 May 2023

Accepted: 25 May 2023

Published: 29 May 2023

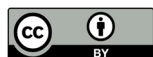

**Copyright:** © 2023 by the authors. Licensee MDPI, Basel, Switzerland. This article is an open access article distributed under the terms and conditions of the Creative Commons Attribution (CC BY) license (<https://creativecommons.org/licenses/by/4.0/>).

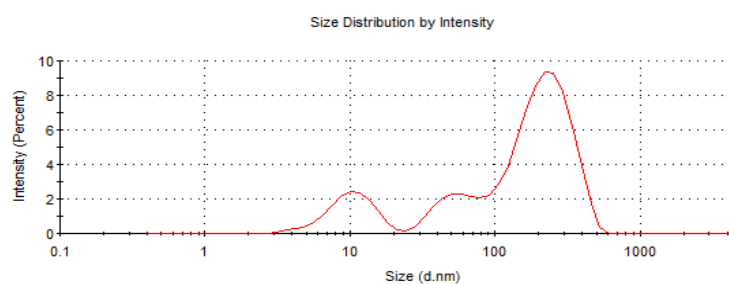

**Figure S4.** DLS data for 0.1% HCP B in water.

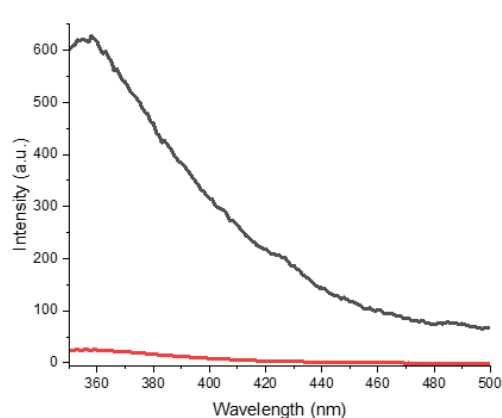

**(a)**

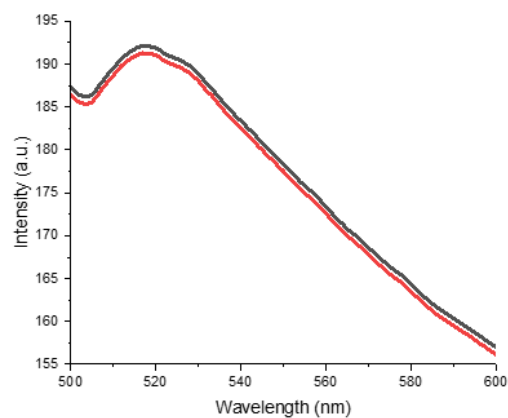

**(b)**

**Figure S5.** Emission spectra of (a) donor solution of positive control before experiment (black) and donor solution after experiment (red) (b) donor solution of negative control before experiment (black) and donor solution after experiment (red).

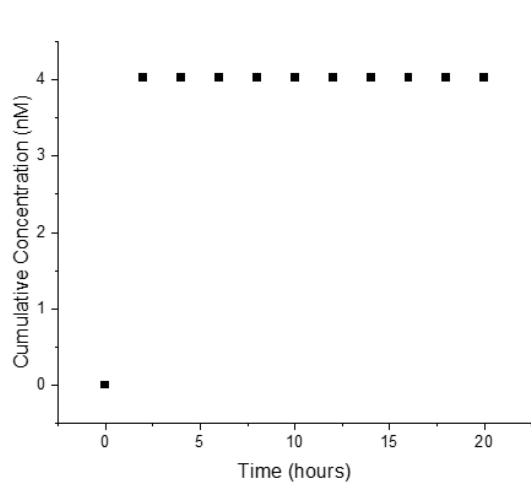

**(a)**

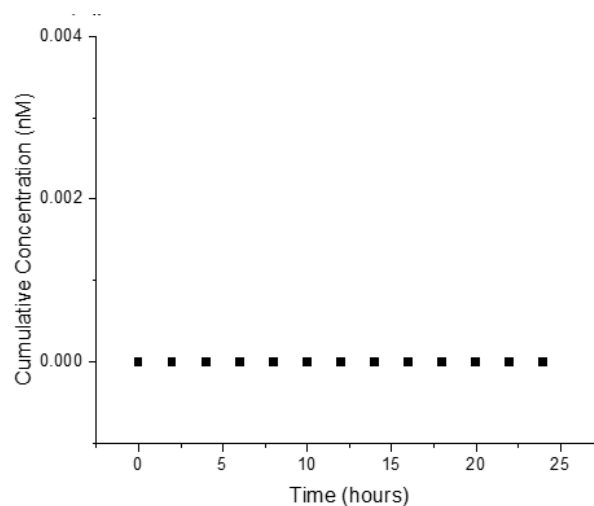

**(b)**

**Figure S6.** Cumulative concentration vs time of (a) positive control (b) negative control.

The equations used for the calibration are shown below.

Positive Control:  $I = 127.307c + 65.7108$

Negative Control:  $I = 5445.865c + 12.7328$

where  $I$  is the fluorescence intensity and  $c$  is the concentration in mM

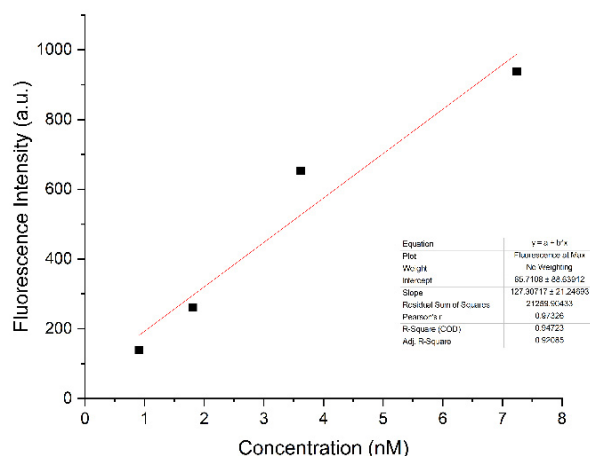

(a)

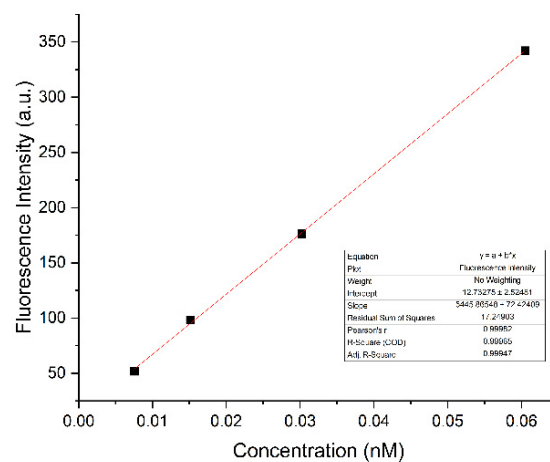

(b)

**Figure S7.** Calibration curve of (a) positive control salicylic acid (b) negative control fluorescein sodium.

The equations obtained for each polymer studied are shown below.

Polymer A:  $I = 31433.397c - 39.201$

BCP A:  $I = 22452.843c + 1.3334$

HCP A:  $I = 30058.374c + 6.5707$

where  $I$  is the fluorescence intensity and  $c$  is the concentration in nM

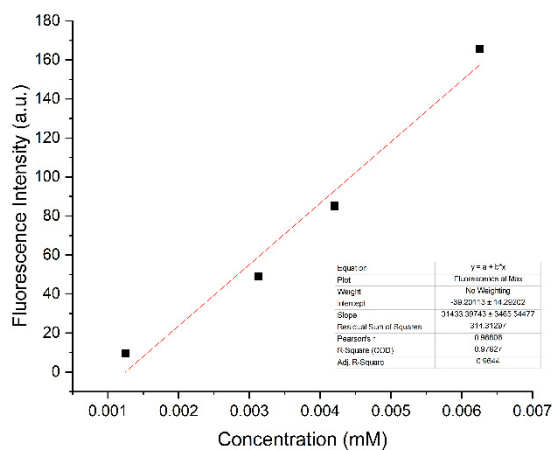

(a)

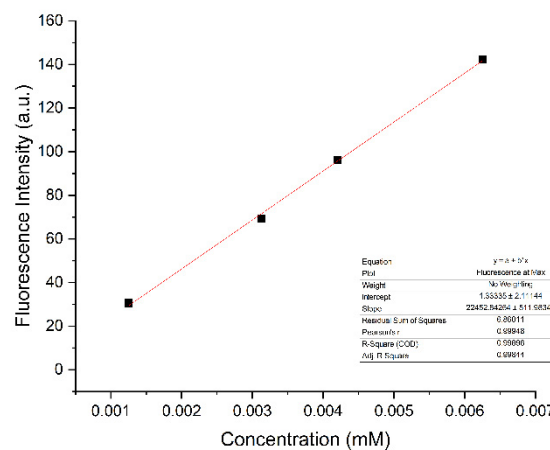

(b)

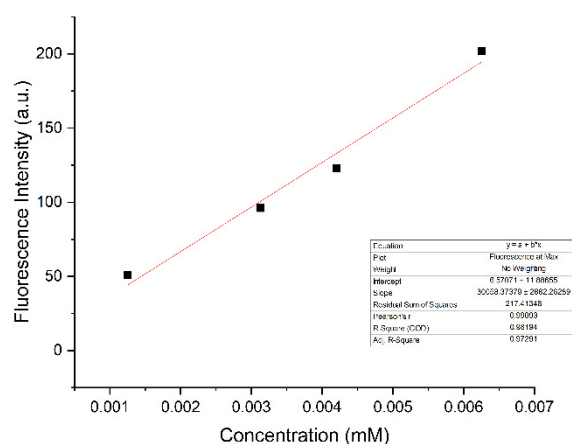

(c)

**Figure S8.** Calibration curve of FITC-aminothiophenol-functionalized (a) homopolymers (b) BCPs (c) HCPs.

A calibration of the FITC-cysteamine-functionalized homopolymer, BCP, and HCP was obtained. The equations obtained for each polymer studied are shown below:

Polymer B:  $I = 52049.707c + 33.165$

BCP B:  $I = 24765.222c + 22.956$

HCP B:  $I = 147278.151c - 111.596$

where  $I$  is the fluorescence intensity and  $c$  is the concentration in mM

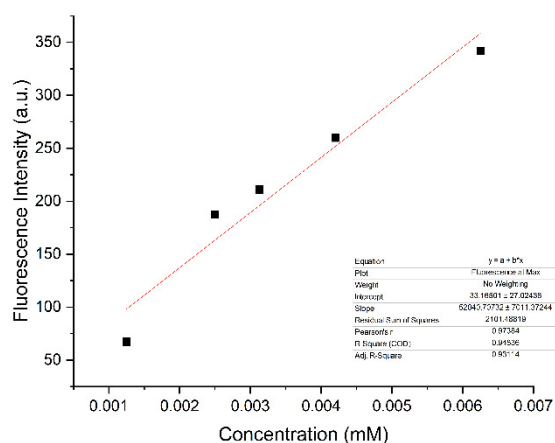

(a)

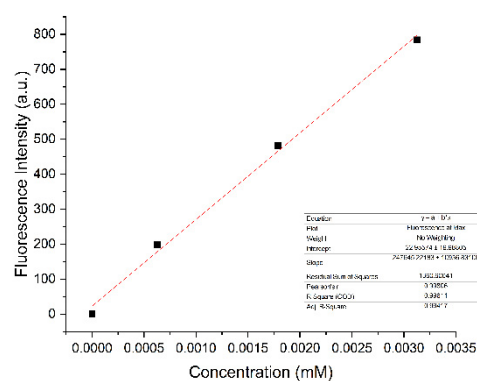

(b)

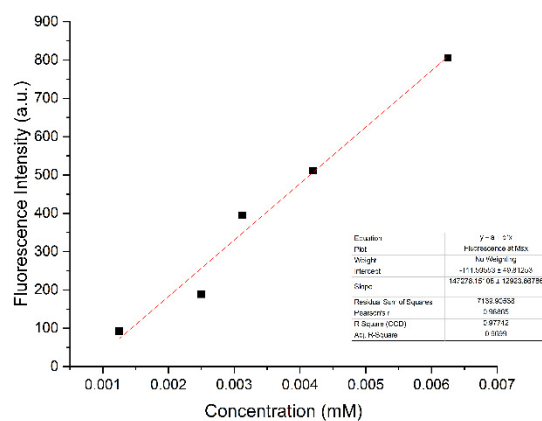

(c)

**Figure S9.** Calibration curve of FITC-cysteamine-functionalized (a) homopolymers (b) BCPs (c) HCPs.
